# Supplementary material
Source: PubMed Central journal article supplement (PMC5927643)
Supplement: kccy-17-04-1383576-s001.pdf [file kccy-17-04-1383576-s001.pdf]

# **Identification of DISE-inducing shRNAs by monitoring cellular responses**

Monal Patel<sup>a</sup> and Marcus E. Peter<sup>a,b</sup>

## **Supplementary data**

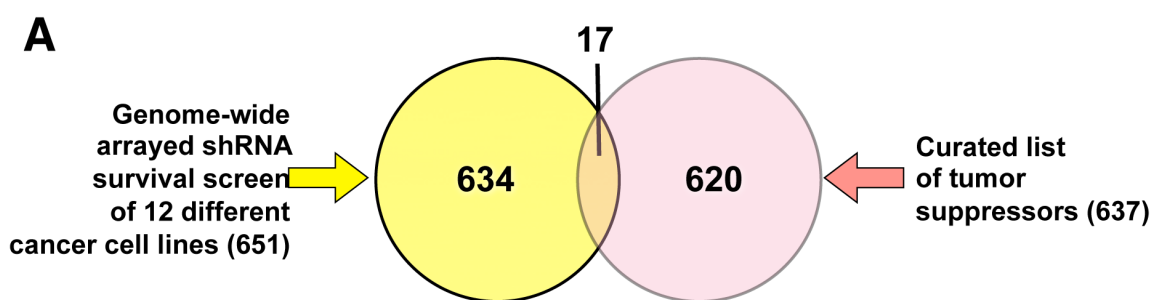

**B**

| The TS-D genes    | Full name                                                                   | TSG for Cancer                                                       | Kd lethal for # of cell lines | AVG H score |
|-------------------|-----------------------------------------------------------------------------|----------------------------------------------------------------------|-------------------------------|-------------|
| PAFAH1B1/LIS1     | Platelet-activating factor acetylhydrolase 1b, regulatory subunit 1 (45kDa) | HCC [1]                                                              | 12                            | 80          |
| NGFR              | Nerve growth factor receptor                                                | HCC [2], retinoblastoma [3], prostate cancer [4], bladder cancer [5] | 11                            | 89          |
| ITGAV/CD51        | Integrin Alpha V                                                            | Ovarian cancer [6], SCC [7]                                          | 11                            | 76          |
| DPP4/CD26         | Dipeptidyl-peptidase 4                                                      | NSCLC [8]                                                            | 10                            | 94          |
| EFNA5             | Ephrin-A5                                                                   | Glioma [9]                                                           | 10                            | 80          |
| TMEFF1            | Transmembrane protein with EGF-like and two follistatin-like domains 1      | Brain cancers [10]                                                   | 10                            | 84          |
| CHEK1             | Checkpoint kinase 1                                                         | BrCa [11], Multiple cancers [12]                                     | 10                            | 55          |
| PTCH2             | Patched 2                                                                   | Basal cell carcinoma [13]                                            | 9                             | 91          |
| ARMC10/SVH        | Armadillo repeat containing 10                                              | Osteosarcoma [14], Leukemia [15]                                     | 9                             | 84          |
| BECN1/ATG6        | Beclin 1                                                                    | Breast cancer [16, 17, 18]                                           | 9                             | 84          |
| FASLG             | Fas ligand                                                                  | Multiple cancers [19]                                                | 9                             | 84          |
| DDX3X/DBX         | DEAD (Asp-Glu-Ala-Asp) box helicase 3, X-linked                             | HCC [20, 21], cutaneous squamous cell carcinoma [21]                 | 9                             | 80          |
| THY1/CD90         | Thy-1 cell surface antigen                                                  | Nasopharyngeal carcinoma [22], ovarian cancer [23, 24]               | 9                             | 87          |
| PHB               | Prohibitin                                                                  | Prostate cancer [25], liver cancer [26]                              | 9                             | 84          |
| SOCS3             | Suppressor of cytokine signaling 3                                          | Breast cancer [27]                                                   | 9                             | 82          |
| ZNF366/DC-SCRIPT  | Zinc finger protein 366                                                     | Breast cancer [28]                                                   | 9                             | 80          |
| MAPKAPK5/MK5/PRAK | Mitogen-activated protein kinase-activated protein kinase 5                 | Colon cancer [29], skin cancer [30]                                  | 9                             | 68          |
| TGFBR2            | Transforming growth factor, beta receptor II (70/80kDa)                     | HCC [31], breast cancer [32, 33]                                     | 9                             | 58          |

**Figure S1: Identification of TS genes among 651 survival genes.** (A) Venn diagram showing the overlap of the 651 putative survival genes we identified in 12 genome-wide shRNAs screens with a list of 637 putative tumor suppressors (<http://bioinfo.mc.vanderbilt.edu/TSGene>). (B) A list of the 17 genes that are putative tumor suppressors and were identified in our lethality screen. The genes are ranked first according to the number of lethality screens in which these genes were found to be survival genes, and second according to the average H score. Higher counts are indicated by darker colors. HCC, hepatocellular carcinoma. FASLG is also shown for comparison. [1], <sup>1</sup>; [2], <sup>2</sup>; [3], <sup>3</sup>; [4], <sup>4</sup>; [5], <sup>5</sup>; [6], <sup>6</sup>; [7], <sup>7</sup>; [8], <sup>8</sup>; [9], <sup>9</sup>; [10], <sup>10</sup>; [11], <sup>11</sup>; [12], <sup>12</sup>; [13], <sup>13</sup>; [14], <sup>14</sup>; [15], <sup>15</sup>; [16], <sup>16</sup>; [17], <sup>17</sup>; [18], <sup>18</sup>; [19], <sup>19</sup>; [20], <sup>20</sup>; [21], <sup>21</sup>; [22], <sup>22</sup>; [23], <sup>23</sup>; [24], <sup>24</sup>; [25], <sup>25</sup>; [26], <sup>26</sup>; [27], <sup>27</sup>; [28], <sup>28</sup>; [29], <sup>29</sup>; [30], <sup>30</sup>; [31], <sup>31</sup>; [32], <sup>32</sup>; [33], <sup>33</sup>. <http://bioinfo.mc.vanderbilt.edu/TSGene> <sup>34</sup>.

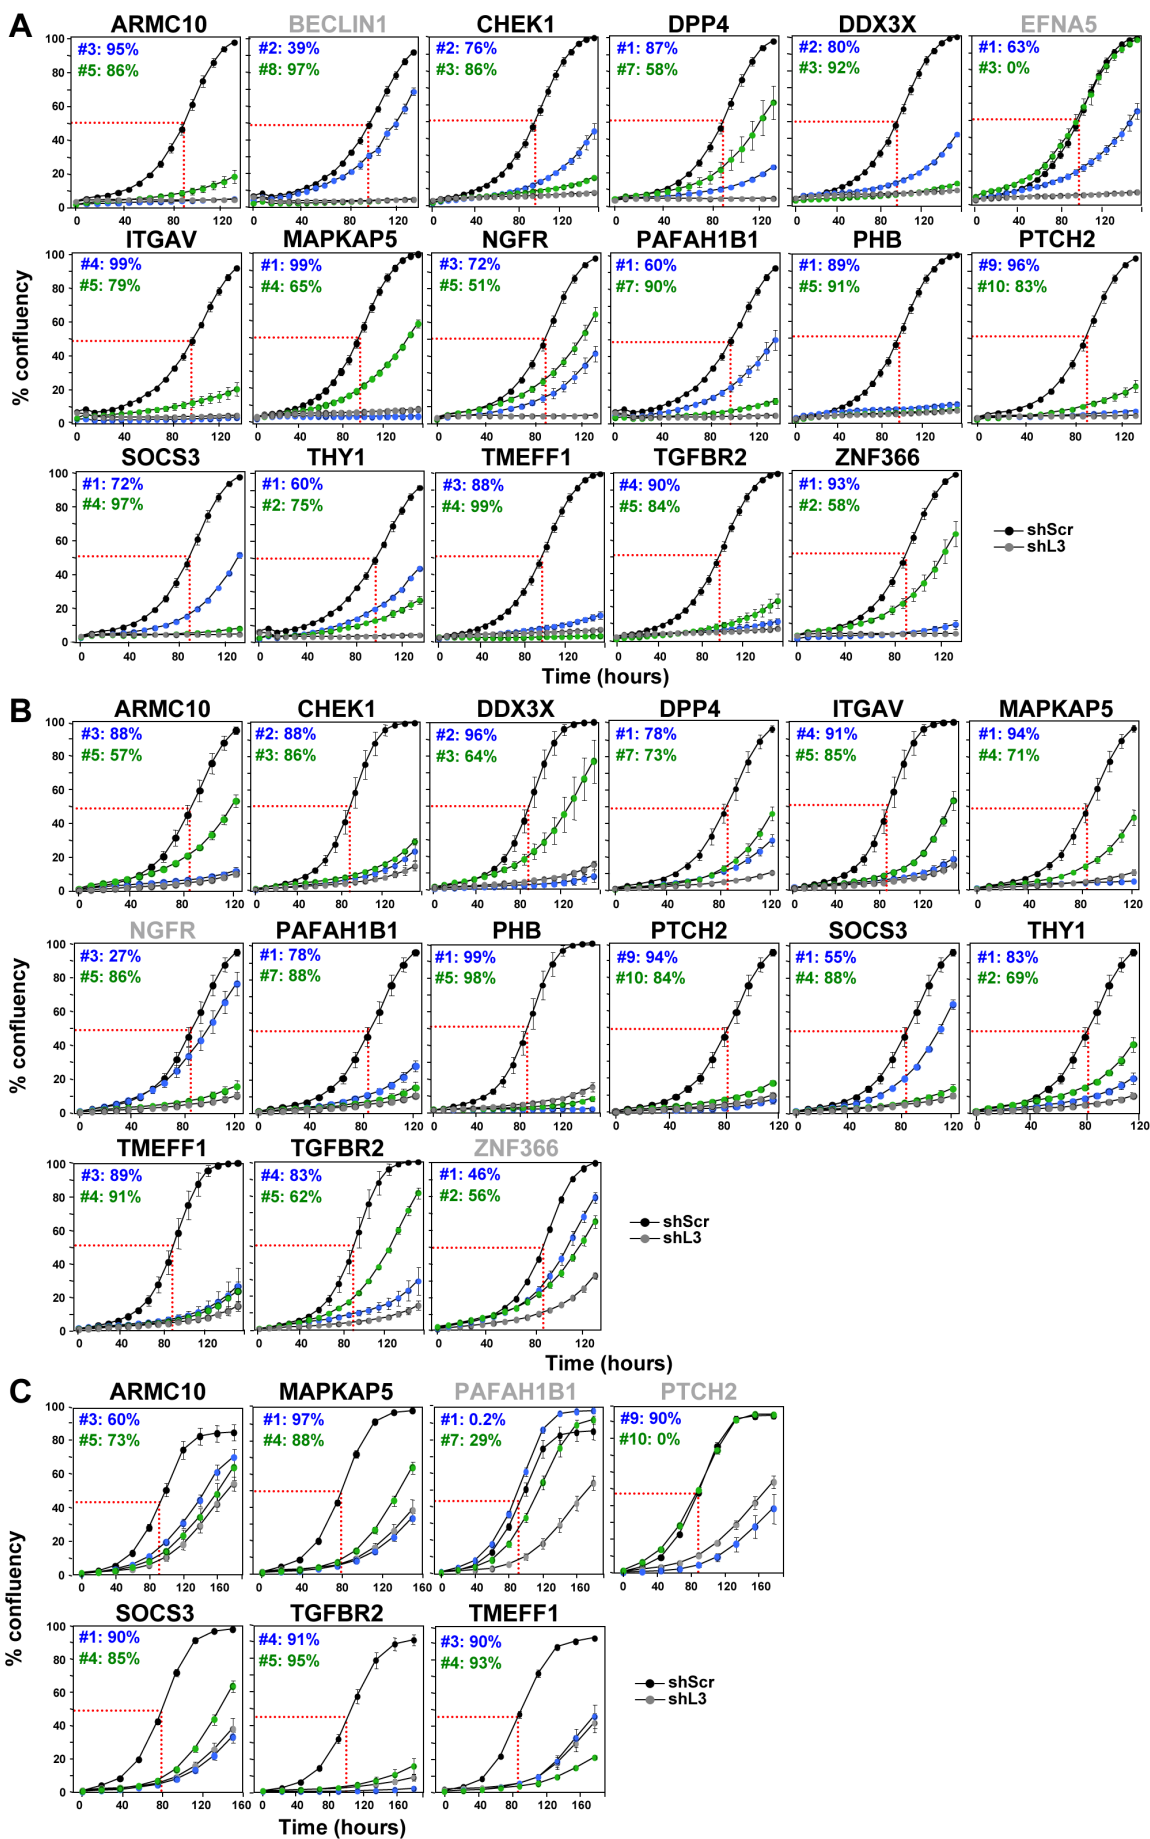

**Figure S2. Toxic shRNAs cause growth reduction in T98G, HCT116 and Hap1 cells.**

Percent cell confluency over time of T98G (A), HCT116 (B) and Hap1 (C) cells infected with shScr, shL3, and two shRNAs derived from each TS gene. The curves for cells infected with two independent shRNA for each TS gene and their specific ID number and respective growth reduction caused by each shRNA are shown in blue and green. Percent growth reduction values (as shown in Table 1) were calculated using STATA1C software when cells infected with shScr reached half maximal confluency as indicated by the red dotted line. Names of genes for which only one of the two shRNAs reduced growth more than 50% are shown in grey.

### Supplementary references

1. Xing Z, Tang X, Gao Y, Da L, Song H, Wang S, et al. The human LIS1 is downregulated in hepatocellular carcinoma and plays a tumor suppressor function. *Biochem Biophys Res Commun* 2011; 409:193-9.
2. Yuanlong H, Haifeng J, Xiaoyin Z, Jialin S, Jie L, Li Y, et al. The inhibitory effect of p75 neurotrophin receptor on growth of human hepatocellular carcinoma cells. *Cancer Lett* 2008; 268:110-9.
3. Dimaras H, Gallie BL. The p75 NTR neurotrophin receptor is a tumor suppressor in human and murine retinoblastoma development. *Int J Cancer* 2008; 122:2023-9.
4. Khwaja F, Tabassum A, Allen J, Djakiew D. The p75(NTR) tumor suppressor induces cell cycle arrest facilitating caspase mediated apoptosis in prostate tumor cells. *Biochem Biophys Res Commun* 2006; 341:1184-92.
5. Tabassum A, Khwaja F, Djakiew D. The p75(NTR) tumor suppressor induces caspase-mediated apoptosis in bladder tumor cells. *Int J Cancer* 2003; 105:47-52.
6. Kaur S, Kenny HA, Jagadeeswaran S, Zillhardt MR, Montag AG, Kistner E, et al.  $\beta$ 3-integrin expression on tumor cells inhibits tumor progression, reduces metastasis, and is associated with a favorable prognosis in patients with ovarian cancer. *Am J Pathol* 2009; 175:2184-96.
7. McCarty JH, Barry M, Crowley D, Bronson RT, Lacy-Hulbert A, Hynes RO. Genetic ablation of  $\alpha$ v integrins in epithelial cells of the eyelid skin and conjunctiva leads to squamous cell carcinoma. *Am J Pathol* 2008; 172:1740-7.
8. Wesley UV, Tiwari S, Houghton AN. Role for dipeptidyl peptidase IV in tumor suppression of human non small cell lung carcinoma cells. *Int J Cancer* 2004; 109:855-66.
9. Li JJ, Liu DP, Liu GT, Xie D. EphrinA5 acts as a tumor suppressor in glioma by negative regulation of epidermal growth factor receptor. *Oncogene* 2009; 28:1759-68.
10. Gery S, Yin D, Xie D, Black KL, Koeffler HP. TMEFF1 and brain tumors. *Oncogene* 2003; 22:2723-7.
11. Sinha S, Singh RK, Bhattacharya N, Mukherjee N, Ghosh S, Alam N, et al. Frequent alterations of LOH11CR2A, PIG8 and CHEK1 genes at chromosomal 11q24.1-24.2 region in breast carcinoma: clinical and prognostic implications. *Mol Oncol* 2011; 5:454-64.
12. Lam MH, Liu Q, Elledge SJ, Rosen JM. Chk1 is haploinsufficient for multiple functions critical to tumor suppression. *Cancer Cell* 2004; 6:45-59.
13. Smyth I, Narang MA, Evans T, Heimann C, Nakamura Y, Chenevix-Trench G, et al. Isolation and characterization of human patched 2 (PTCH2), a putative tumour suppressor gene in basal cell carcinoma and medulloblastoma on chromosome 1p32. *Human Mol Gen* 1999; 8:291-7.
14. Zhou X, Yang G, Huang R, Chen X, Hu G. SVH-B interacts directly with p53 and suppresses the transcriptional activity of p53. *FEBS Lett* 2007; 581:4943-8.
15. Curtiss NP, Bonifas JM, Lauchle JO, Balkman JD, Kratz CP, Emerling BM, et al. Isolation and analysis of candidate myeloid tumor suppressor genes from a commonly deleted segment of 7q22. *Genomics* 2005; 85:600-7.
16. Furuya N, Yu J, Byfield M, Pattingre S, Levine B. The evolutionarily conserved domain of Beclin 1 is required for Vps34 binding, autophagy and tumor suppressor function. *Autophagy* 2005; 1:46-52.
17. Liang XH, Yu J, Brown K, Levine B. Beclin 1 contains a leucine-rich nuclear export signal that is required for its autophagy and tumor suppressor function. *Cancer Res* 2001; 61:3443-9.
18. Aita VM, Liang XH, Murty VV, Pincus DL, Yu W, Cayanis E, et al. Cloning and genomic organization of beclin 1, a candidate tumor suppressor gene on chromosome 17q21. *Genomics* 1999; 59:59-65.

19. Muschen M, Warskulat U, Beckmann MW. Defining CD95 as a tumor suppressor gene. *J Mol Med (Berl)* 2000; 78:312-25.
20. Shih JW, Tsai TY, Chao CH, Wu Lee YH. Candidate tumor suppressor DDX3 RNA helicase specifically represses cap-dependent translation by acting as an eIF4E inhibitory protein. *Oncogene* 2008; 27:700-14.
21. Chao CH, Chen CM, Cheng PL, Shih JW, Tsou AP, Lee YH. DDX3, a DEAD box RNA helicase with tumor growth-suppressive property and transcriptional regulation activity of the p21waf1/cip1 promoter, is a candidate tumor suppressor. *Cancer Res* 2006; 66:6579-88.
22. Lung HL, Cheung AK, Cheng Y, Kwong FM, Lo PH, Law EW, et al. Functional characterization of THY1 as a tumor suppressor gene with antiinvasive activity in nasopharyngeal carcinoma. *Int J Cancer* 2010; 127:304-12.
23. Abeysinghe HR, Pollock SJ, Guckert NL, Veyberman Y, Keng P, Halterman M, et al. The role of the THY1 gene in human ovarian cancer suppression based on transfection studies. *Cancer Genet Cytogenet* 2004; 149:1-10.
24. Abeysinghe HR, Cao Q, Xu J, Pollock S, Veyberman Y, Guckert NL, et al. THY1 expression is associated with tumor suppression of human ovarian cancer. *Cancer Genet Cytogenet* 2003; 143:125-32.
25. Dart DA, Spencer-Dene B, Gamble SC, Waxman J, Bevan CL. Manipulating prohibitin levels provides evidence for an in vivo role in androgen regulation of prostate tumours. *Endocr Relat Cancer* 2009; 16:1157-69.
26. Ko KS, Tomasi ML, Iglesias-Ara A, French BA, French SW, Ramani K, et al. Liver-specific deletion of prohibitin 1 results in spontaneous liver injury, fibrosis, and hepatocellular carcinoma in mice. *Hepatology* 2010; 52:2096-108.
27. Barclay JL, Anderson ST, Waters MJ, Curlew JD. SOCS3 as a tumor suppressor in breast cancer cells, and its regulation by PRL. *Int J Cancer* 2009; 124:1756-66.
28. Ansems M, Hontelez S, Karthaus N, Span PN, Adema GJ. Crosstalk and DC-SCRIPT: expanding nuclear receptor modulation. *Biochim Biophys Acta* 2010; 1806:193-9.
29. Kress TR, Cannell IG, Brenkman AB, Samans B, Gaestel M, Roepman P, et al. The MK5/PRAK kinase and Myc form a negative feedback loop that is disrupted during colorectal tumorigenesis. *Mol Cell* 2011; 41:445-57.
30. Sun P, Yoshizuka N, New L, Moser BA, Li Y, Liao R, et al. PRAK is essential for ras-induced senescence and tumor suppression. *Cell* 2007; 128:295-308.
31. Riehle KJ, Campbell JS, McMahan RS, Johnson MM, Beyer RP, Bammler TK, et al. Regulation of liver regeneration and hepatocarcinogenesis by suppressor of cytokine signaling 3. *J Exp Med* 2008; 205:91-103.
32. Forrester E, Chytil A, Bierie B, Aakre M, Gorska AE, Sharif-Afshar AR, et al. Effect of conditional knockout of the type II TGF-beta receptor gene in mammary epithelia on mammary gland development and polyomavirus middle T antigen induced tumor formation and metastasis. *Cancer Res* 2005; 65:2296-302.
33. Shida N, Ikeda H, Yoshimoto T, Oshima M, Taketo MM, Miyoshi I. Estrogen-induced tumorigenesis in the pituitary gland of TGF-beta(+/-) knockout mice. *Biochim Biophys Acta* 1998; 1407:79-83.
34. Zhao M, Sun J, Zhao Z. TSGene: a web resource for tumor suppressor genes. *Nucleic Acids Res* 2013; 41:D970-6.
